# Supplementary material
Source: MDPI journal article supplement (https://www.mdpi.com/2073-4395/10/9/1443)

# Quality and Storability of Trellised Greenhouse-Grown, Winter-Harvested, New Sweet Acorn Squash Hybrids

Ayobami Adeeko <sup>1,2</sup>, Fabiola Yudelevich <sup>1</sup>, Ginat Raphael <sup>1</sup>, Lior Avraham <sup>3</sup>, Hana Alon <sup>4</sup>, Merav Zaaroor Presman <sup>1</sup>, Sharon Alkalai-Tuvia <sup>1</sup>, Harry S. Paris <sup>5</sup>, Elazar Fallik <sup>1</sup> and Carmit Ziv <sup>1,\*</sup>

## Supplementary Materials

**Table S1:** Fruit quality parameters of acorn squash fruits at harvest, according to cultivar and harvest sequence

**Figure S1:** Fruit weight by cultivar and harvest sequence over three years

**Figure S2:** Yield by cultivar and harvest sequence over three years

**Figure S3:** Identification and quantification of acorn squash carotenoids.

**Figure S4:** Hedonic tests of three acorn squash cultivars from two separate harvests (Harvest 1 and Harvest 2) after two months of storage, at 15°C Rh 95% and 20°C Rh 60%.

**Table S1.** Fruit quality parameters of acorn squash fruits at harvest according to cultivar and harvest sequence

| Year-harvest                        | Cultivar <sup>x</sup> | Rind color (Hue <sup>o</sup> ) | Flesh color (*a) | TSS (%)     | Dry Weight (%) | Firmness (N) |
|-------------------------------------|-----------------------|--------------------------------|------------------|-------------|----------------|--------------|
| 2017 – 1 <sup>st</sup>              | 1700                  | 231 f                          | 4.5 abcdef       | 9.7 f       | 15.7 de        | 162 bcde     |
|                                     | 2054                  | 247 def                        | 4.8 abcde        | 14.5 abcdef | 20.3 cde       | 171 bcd      |
|                                     | 2005                  | 250 de                         | 7.1 abc          | 11.3 def    | 18.9 cde       | 148 ef       |
| 2017 – 2 <sup>nd</sup>              | 1700                  | n.d. <sup>y</sup>              | n.d.             | 18.7 abc    | n.d.           | n.d.         |
|                                     | 2054                  |                                |                  | 20.7 a      |                |              |
|                                     | 2005                  |                                |                  | 20.4 a      |                |              |
| 2017 – 3 <sup>rd</sup>              | 1700                  | 192 g                          | n.d.             | 17.7 abcd   | n.d.           | 226 a        |
|                                     | 2054                  | 201 g                          |                  | 13.7 bcdef  |                | 177 b        |
|                                     | 2005                  | 233 ef                         |                  | 9.4 f       |                | 207 a        |
| 2018 – 1 <sup>st</sup>              | 1700                  | 276 ab                         | 3.5 bcdef        | 15.4 abcdef | 24.5 abcd      | 154 def      |
|                                     | 2054                  | 282 ab                         | 2.0 def          | 15.7 abcdef | 25.1 abcd      | 154 cdef     |
|                                     | 2005                  | 286 a                          | 0.8 ef           | 11.1 def    | 20.1 cde       | 139 f        |
| 2018 – 2 <sup>nd</sup>              | 1700                  | 266 abcd                       | 5.9 abcd         | 19.5 ab     | 29.6 ab        | 171 bcd      |
|                                     | 2054                  | 282 abc                        | 3.0 cdef         | 16.4 abcde  | 32.3 a         | 160 bcdef    |
|                                     | 2005                  | 282 abc                        | 8.4 a            | 18.4 abc    | 25.8 abc       | 175 bc       |
| 2019 – 2 <sup>nd</sup>              | 1700                  | 259 bcd                        | 2.3 def          | 14.2 bcdef  | 20.7 cde       |              |
|                                     | 2054                  | 281 a                          | 0.6 f            | 11.1 ef     | 20.7 cde       | n.d.         |
|                                     | 2005                  | 273 ab                         | 2.6 def          | 11.4 ef     | 15.3 e         |              |
| 2019 – 3 <sup>rd</sup>              | 1700                  | 208 g                          | 4.7 abcde        | 13.5 cdef   | 22.5 bcd       |              |
|                                     | 2054                  | 233 f                          | 3.4 bcdef        | 13.4 bcdef  | 23.1 bcd       | n.d.         |
|                                     | 2005                  | 253 cd                         | 7.2 ab           | 12.2 def    | 18.3 cde       |              |
| <b>LSD</b>                          |                       | <b>15.8</b>                    | <b>1.39</b>      | <b>1.80</b> | <b>2.59</b>    | <b>6.3</b>   |
| <b>Mean values at each harvest</b>  |                       |                                |                  |             |                |              |
| 2017 – 1 <sup>st</sup>              |                       | 243 b                          | 5.5 a            | 11.9 b      | 18.3 c         | 203 a        |
| 2017 – 2 <sup>nd</sup>              |                       | n.d.                           | n.d.             | 19.9 a      | n.d.           | n.d.         |
| 2017 – 3 <sup>rd</sup>              |                       | 209 d                          | n.d.             | 13.6 b      | n.d.           | 161 c        |
| 2018 – 1 <sup>st</sup>              |                       | 281 a                          | 2.1 b            | 14.1 b      | 23.2 b         | 149 b        |
| 2018 – 2 <sup>nd</sup>              |                       | 277 a                          | 5.8 a            | 18.1 a      | 29.2 a         | 169 b        |
| 2019 – 2 <sup>nd</sup>              |                       | 271 a                          | 1.8 b            | 12.2 b      | 18.9 c         | n.d.         |
| 2019 – 3 <sup>rd</sup>              |                       | 232 c                          | 5.1 a            | 13.0 b      | 21.3 bc        | n.d.         |
| <b>LSD<sup>z</sup></b>              |                       | <b>8.9</b>                     | <b>0.80</b>      | <b>1.01</b> | <b>1.46</b>    | <b>3.6</b>   |
| <b>Mean values of each cultivar</b> |                       |                                |                  |             |                |              |
| 1700                                |                       | 239 c                          | 4.2 a            | 15.5 a      | 22.6 a         | 178 a        |
| 2054                                |                       | 254 b                          | 2.8 b            | 15.1 a      | 24.6 a         | 165 b        |
| 2005                                |                       | 263 a                          | 5.2 a            | 13.5 b      | 19.7 b         | 167 b        |
| <b>LSD</b>                          |                       | <b>25.7</b>                    | <b>0.58</b>      | <b>0.64</b> | <b>1.08</b>    | <b>3.1</b>   |
| <b>Table of Variance (F-value)</b>  |                       |                                |                  |             |                |              |
| Harvest (Hr)                        |                       | ***                            | ***              | ***         | ***            | ***          |
| Cultivar (Cv)                       |                       | ***                            | ***              | **          | ***            | ***          |
| Hr x Cv                             |                       | ***                            | *                | ***         | NS             | ***          |

Table S1 – continued:

<sup>x</sup> Cultivars evaluated: 1700 = Hybrid 1700, 'Table Sugar'; 2054 = Hybrid 2054, 'Table Pastry'; 2005 = Hybrid 2005, 'Table Confection'. <sup>y</sup> n.d., not determined. <sup>z</sup> LSD, Least significant differences at  $\alpha = 0.05$ . Means within columns followed by the same letter are not significantly different at  $P \leq 0.05$ , based on the least significant differences test, \*\*\*, \*\*, \*, NS indicate statistical significance at  $P \leq 0.001$ , 0.01, 0.05 and not significant, respectively.

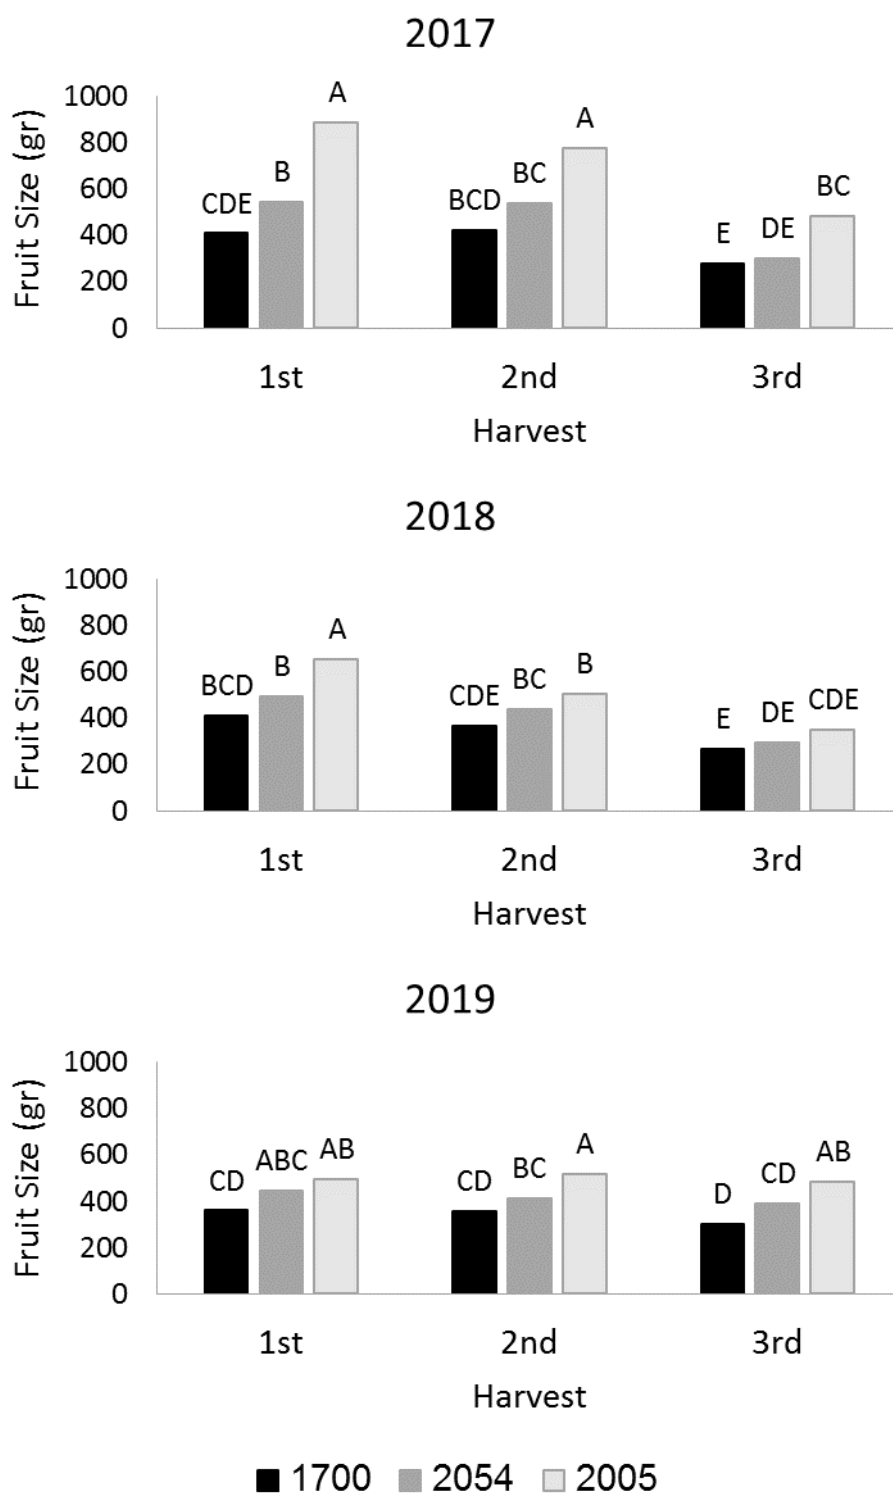

**Figure S1:** Fruit weight by cultivar and harvest sequence over three years.

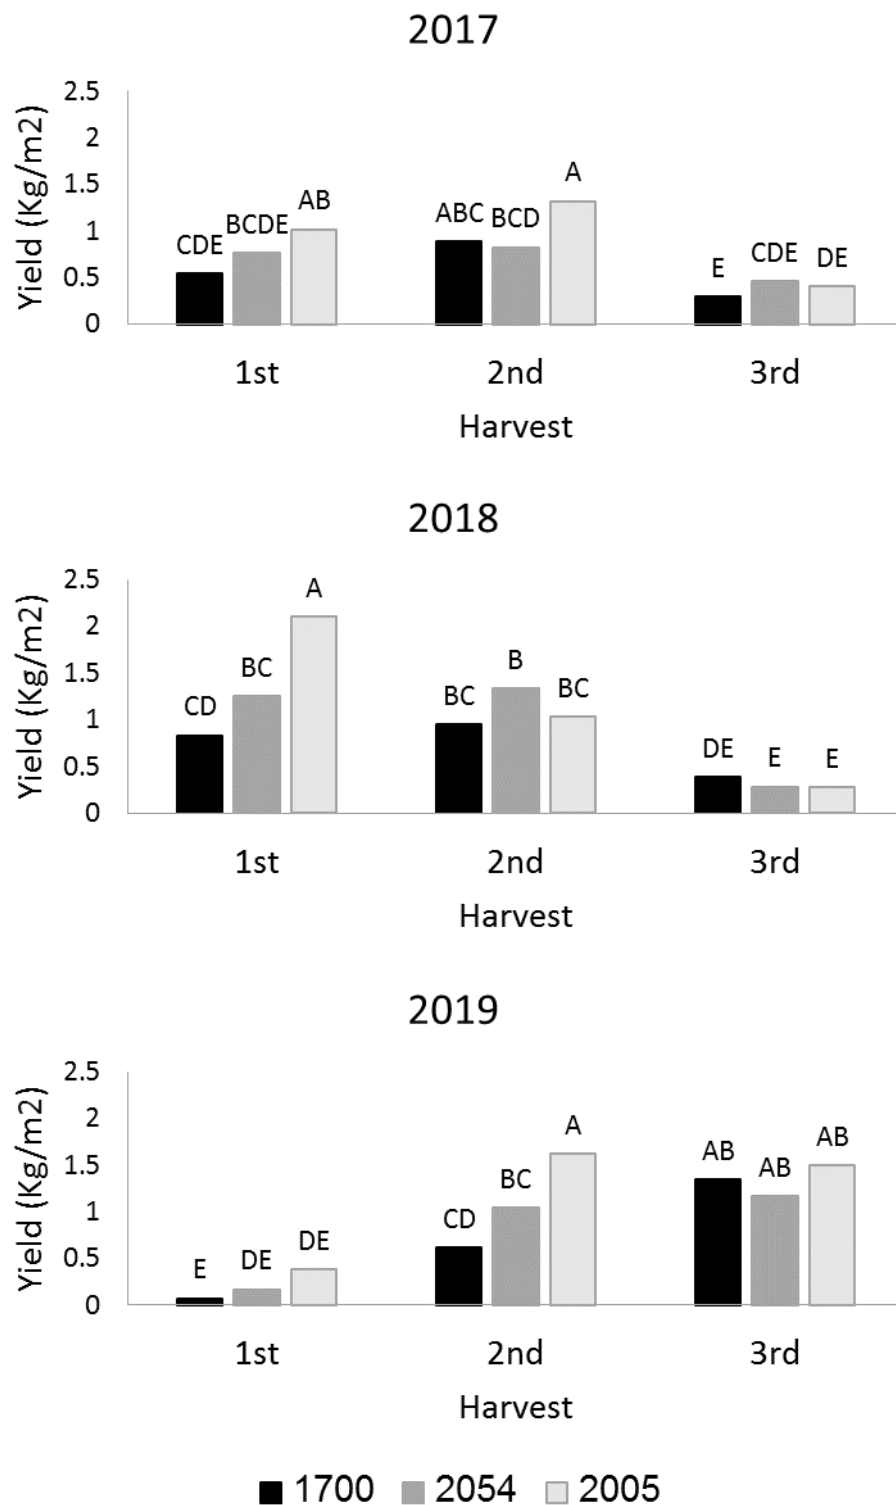

**Figure S2:** Yield by cultivar and harvest sequence over three years

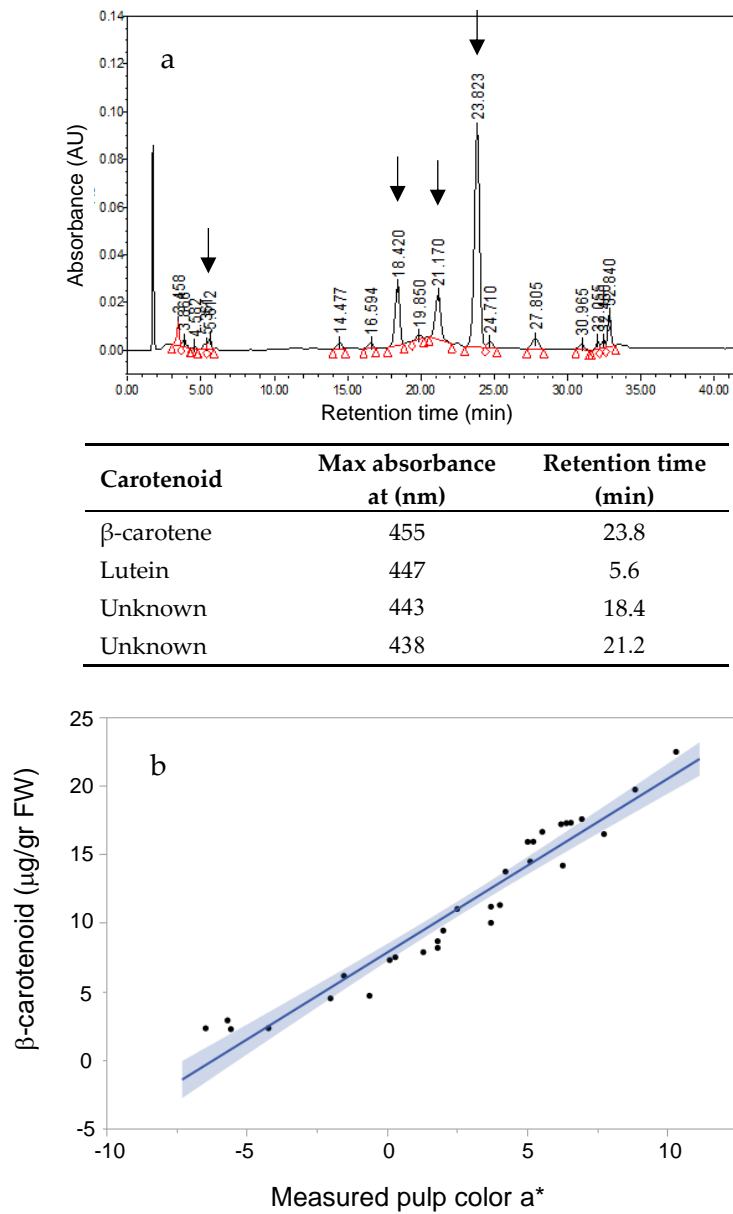

**Figure S3:** Identification and quantification of acorn squash carotenoids. (a) HPLC chromatographic pattern of carotenoids extracted from acorn squash fruit flesh. AU, arbitrary units of absorbance at 450 nm. Arrows mark the peaks that are specified in the table below. (b) Correlation between measured pulp color  $a^*$  and the carotenoids ( $\beta$ -carotenoid,  $\mu\text{g/g FW}$ ) extracted from fruits at various ripening stages,  $n = 30$ ,  $r = 0.95$ ,  $P < 0.001$ . The  $a^*$  color space is linearly correlated to  $\beta$ -carotenoid at  $a^* > -5$ .

**Figure S4:** Hedonic tests of three acorn squash cultivars from two separate harvests (Harvest 1 and Harvest 2) after two months of storage, at 15°C Rh 95% (15DEG) and 20°C Rh 60% (20DEG). Results for sweetness (Sweet), texture, general impression (Impression) and bitterness at the end of storage are presented. (1) and (2) indicate the harvest.

The score of each parameter was 1 to 4:

Sweetness 1- not sweet, 2-slightly sweet, 3- moderately sweet, 4- very sweet.

Texture 1- very fibrous, 2- fibrous, 3- slightly fibrous, 4- very smooth.

General impression 1- not tasty, 2-slightly tasty, 3- moderately tasty, 4- very tasty.

Bitterness 1- very bitter, 2- moderately bitter, 3- slightly bitter, 4- not bitter.

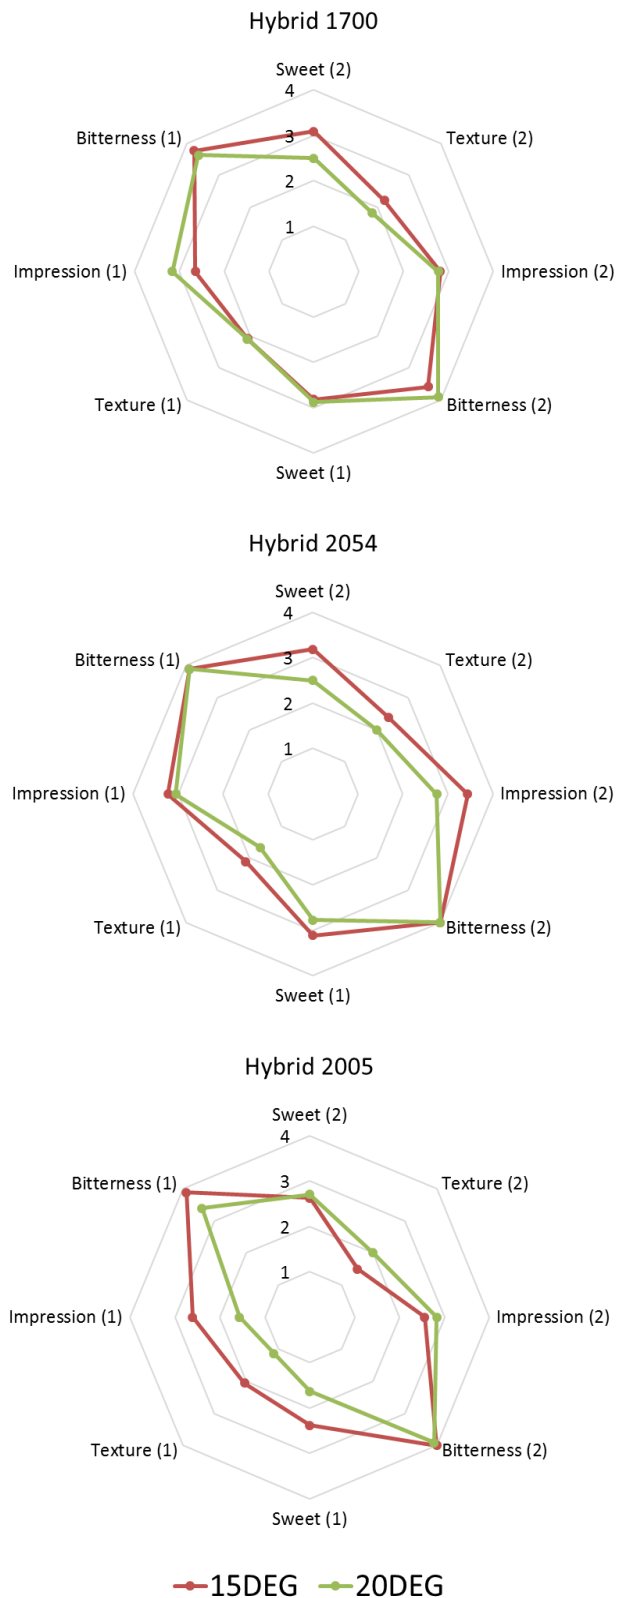

Supplement: s1 [file s1]
